# Supplementary material for: A threat-centered theory of policy entrepreneurship
Source: Springer Nature journal article supplement (doi:10.1007/s11077-021-09445-z), 2021-12-11
Supplement: MOESM1 [file 19951852]

**Supplemental information (SI) for “A threat-centered theory of policy entrepreneurship”**

| **Table A1. Potential non-response bias** | | | |
| --- | --- | --- | --- |
|  | Mean: Population | Mean: Response sample | Significance of difference |
| Obama 2008 vote share | 0.48 | 0.47 | * |
| Environmental policy, 2003-2007 | 0.63 | 0.63 |  |
| Tourism policy, 2003-2007 | 0.05 | 0.06 |  |
| Land use tools | 3.80 | 3.73 |  |
| Average municipal revenue, 2008-2012 | 6.50 | 6.56 |  |
| Per capita income | 10.20 | 10.22 |  |
| High school education or GED | 0.89 | 0.89 |  |
| Landowner coalition | 0.18 | 0.18 |  |
| Population density | 5.63 | 5.42 | * |
| Oily/gaseous spills | 2.87 | 2.69 | * |
| Oil/gas wells | 2.69 | 2.18 |  |
| Shales | 0.70 | 0.68 |  |
| City | 0.04 | 0.03 | * |
| *Notes*: One-tailed t-tests (unpaired data, unequal variance assumed) of null hypothesis that means are equivalent: * *p<*0.05. N=476-481 respondents and 1,043-1,058 non-respondents (variation due to some listwise deletion associated with missing data). | | | |

| **Table A2. Descriptive statistics** |  |  |  |  |  |
| --- | --- | --- | --- | --- | --- |
|  | Mean | Standard deviation | Minimum | Maximum | N |
| Anti-fracking policy entrepreneur, 2009 | 0.03 | 0.17 | 0 | 1 | 481 |
| Anti-fracking policy entrepreneur, 2010 | 0.06 | 0.23 | 0 | 1 | 481 |
| Anti-fracking policy entrepreneur, 2011 | 0.07 | 0.26 | 0 | 1 | 481 |
| Anti-fracking policy entrepreneur, 2012 | 0.11 | 0.31 | 0 | 1 | 481 |
| Anti-fracking policy entrepreneur, 2008-2009 | 0.03 | 0.17 | 0 | 1 | 481 |
| Anti-fracking policy entrepreneur, 2008-2010 | 0.06 | 0.24 | 0 | 1 | 481 |
| Anti-fracking policy entrepreneur, 2008-2011 | 0.09 | 0.29 | 0 | 1 | 481 |
| Pro-fracking policy entrepreneur, 2010 | 0.02 | 0.15 | 0 | 1 | 481 |
| Pro-fracking policy entrepreneur, 2011 | 0.04 | 0.19 | 0 | 1 | 481 |
| Pro-fracking policy entrepreneur, 2012 | 0.04 | 0.20 | 0 | 1 | 481 |
| Pro-fracking policy entrepreneur, 2008-2009 | 0.01 | 0.11 | 0 | 1 | 481 |
| Pro-fracking policy entrepreneur, 2008-2010 | 0.02 | 0.16 | 0 | 1 | 481 |
| Pro-fracking policy entrepreneur, 2008-2011 | 0.05 | 0.21 | 0 | 1 | 481 |
| Obama 2008 vote share | 0.47 | 0.09 | 0.22 | 0.82 | 479 |
| Environmental policy, 2003-2007 | 0.63 | 0.48 | 0 | 1 | 481 |
| Tourism policy, 2003-2007 | 0.06 | 0.23 | 0 | 1 | 481 |
| Land use tools | 3.73 | 1.59 | 0 | 5 | 480 |
| Average municipal revenue, 2009 (logged) | 6.53 | 0.84 | 2.17 | 11.15 | 480 |
| Average municipal revenue, 2010 (logged) | 6.55 | 0.86 | 2.15 | 11.17 | 480 |
| Average municipal revenue, 2011 (logged) | 6.53 | 0.84 | 2.17 | 11.15 | 480 |
| Average municipal revenue, 2012 (logged) | 6.61 | 0.87 | 2.19 | 11.25 | 480 |
| Socioeconomic status | 0.08 | 1.75 | -6.34 | 6.03 | 480 |
| Neighbor anti-fracking policymaking, 2008 | 0.03 | 0.24 | 0 | 4 | 481 |
| Neighbor anti-fracking policymaking, 08-09 | 0.05 | 0.33 | 0 | 4 | 481 |
| Neighbor anti-fracking policymaking, 08-10 | 0.08 | 0.49 | 0 | 6 | 481 |
| Neighbor anti-fracking policymaking, 08-11 | 0.16 | 0.61 | 0 | 6 | 481 |
| Neighbor pro-fracking policymaking, 08-09 | 0.01 | 0.09 | 0 | 2 | 481 |
| Neighbor pro-fracking policymaking, 08-10 | 0.03 | 0.15 | 0 | 2 | 481 |
| Neighbor pro-fracking policymaking, 08-11 | 0.03 | 0.15 | 0 | 2 | 481 |
| Landowner coalition | 0.18 | 0.38 | 0 | 1 | 481 |
| Population density (logged) | 5.42 | 1.91 | -0.36 | 9.97 | 481 |
| Own pro-fracking policymaking, 2008 | 0.00 | 0.06 | 0 | 1 | 481 |
| Own pro-fracking policymaking, 2008-2009 | 0.01 | 0.08 | 0 | 1 | 481 |
| Own pro-fracking policymaking, 2008-2010 | 0.02 | 0.13 | 0 | 1 | 481 |
| Own pro-fracking policymaking, 2008-2011 | 0.02 | 0.13 | 0 | 1 | 481 |
| Own anti-fracking policymaking, 2008-2009 | 0.16 | 0.37 | 0 | 1 | 481 |
| Own anti-fracking policymaking, 2008-2010 | 0.03 | 0.17 | 0 | 1 | 481 |
| Own anti-fracking policymaking, 2008-2011 | 0.07 | 0.25 | 0 | 1 | 481 |
| Oily/gaseous spills | 2.57 | 1.51 | 0 | 6.96 | 481 |
| Oil/gas wells | 2.18 | 10.54 | 0 | 173 | 481 |
| Shales | 0.68 | 0.47 | 0 | 1 | 481 |
| City | 0.03 | 0.16 | 0 | 1 | 481 |
| Loss signals to an anti PE, 2008 | 0.18 | 0.42 | 0 | 2 | 481 |
| Loss signals to an anti PE, 08-09 | 0.20 | 0.44 | 0 | 2 | 481 |
| Loss signals to an anti PE, 08-10 | 0.22 | 0.51 | 0 | 3 | 481 |
| Loss signals to an anti PE, 08-11 | 0.24 | 0.54 | 0 | 3 | 481 |
|  |  |  |  |  |  |
|  |  |  |  |  |  |
|  |  |  |  |  |  |

**Supplemental analysis SA1. Hierarchical Clustering Analysis (HCA)**

HCA is used to identify policy entrepreneur archetypes whose emergence the main analysis then predicts. The HCA employs Ward’s method, an agglomerative procedure where clusters are merged in a stepwise manner that minimizes the increase in the error sum of squares between groups. While different clustering approaches can yield different results, Ward’s method is common (Murtagh and Contreras 2012) and tends to achieve high accuracy (Blashfield 1976). The HCA initially considered each policy entrepreneur as a single unit and successively merged pairs of clusters based on similarity across 11 possible PE characteristics (C), 10 strategies (S), and 7 (pro-fracking) and 8 (anti-fracking) goals (G). The C, S, and G elements, drawn from Mintrom and Norman’s (2009) framework defining PE attributes and behaviors with emendations from Arnold (2020) (see also Aviram et al. 2020), encompass:

1. *Social acuity* (C): Does the PE live or regularly work in the community? Is the PE well-respected or friendly? Does she engage in advocacy on other issues?
2. *Building networks/teams* (C): Does the PE know many community members, many local officials, may important local residents, or many important people in the state or region?
3. *Defining problems* (S): Did the PE speak at a public meeting, write a letter or email to a newspaper, give a presentation to an organization or group, or circulate a petition?
4. *Leading by example* (S): Was the PE a highly active advocate? Did she devote lots of time or money to her efforts?
5. *Knowledgeable* (C): Was the PE knowledgeable about how local government operates or about fracking?
6. *Organizing* (S): Did the PE organize a protest, rally, sit-in, or demonstration? Did she form an organization or group to pursue advocacy?
7. *Ambitious goals* (G): Did an anti-fracking PE seek a moratorium, ban, preventative zoning, or a prohibition on leasing of municipal land? Did a pro-fracking PE encourage the municipality to sign a lease with an oil/gas company, issue permits for seismic/geophysical testing, or adopt zoning that facilitates fracking?
8. *Moderate goals* (G): Did the anti-fracking PE seek an oppositional resolution, road use ordinance, performance bonding, or zoning limiting but not preventing fracking? Did a pro-fracking PE seek a supportive resolution, road use ordinance, performance bonding, or a moratorium (intended to give time to adjust local regulations in favorable ways)?

Table A3 summarizes the number of characteristics, strategies, and goals deployed by all anti-fracking and pro-fracking PEs. The average anti-fracking and pro-fracking policy entrepreneur both exhibited nearly five entrepreneurial characteristics. The average anti-fracking PE employed nearly four different strategies, while the typical pro-fracking PE used between two and three. Anti-fracking PEs typically pursued more goals (average 3) than pro-fracking PEs (average 1).

The final number of clusters was determined by visually inspecting dendograms and calculating the Calinksi and Harabasz (1974) pseudo-F index and the Duda-Hart (2001) index, describing between- versus within-cluster variance (see Zenina and Borisov 2013; Arnold 2020).

| **Table A3. Policy entrepreneur descriptive statistics** | | | | |
| --- | --- | --- | --- | --- |
| Anti-fracking policy entrepreneurs | | | | |
|  | Mean | Standard deviation | Min | Max |
| Total number of characteristics | 4.91 | 2.50 | 0 | 10 |
| Total number of strategies | 3.91 | 2.38 | 0 | 9 |
| Total number of policy goals | 3.11 | 1.82 | 0 | 8 |
| Pro-fracking policy entrepreneurs | | | | |
| Total number of characteristics | 4.94 | 2.39 | 1 | 10 |
| Total number of strategies | 2.49 | 2.09 | 0 | 8 |
| Total number of policy goals | 1.19 | 0.97 | 0 | 3 |
| *Notes*: N=71 for anti-fracking PEs, 37 for pro-fracking PEs. | | | | |

**Tables A4-A7. Correlation matrices for independent variables**

Correlations are not calculated for county, a nominal variable. Correlations are presented for variables spanning 2008-2012; correlations for derivations of these variables included in annual models are similar and are available upon request.

**Table A4. Matrix of Pearson correlations for continuous variables**

|  | (1) | (2) | (3) | (4) | (5) | (6) | (7) | (8) | (9) |
| --- | --- | --- | --- | --- | --- | --- | --- | --- | --- |
| (1) Obama 2008 vote share | 1.000 |
| (2) Population density (logged) | 0.325 | 1.000 |
| (3) Average municipal revenue, 08-12 (logged) | 0.111 | 0.045 | 1.000 |
| (4) Socioeconomic status | 0.271 | 0.281 | 0.218 | 1.000 |
| (5) Oily/gaseous spills | 0.315 | 0.186 | 0.045 | 0.114 | 1.000 |
| (6) Oil/gas wells | -0.159 | -0.126 | -0.065 | -0.078 | -0.041 | 1.000 |
| (7) Neighbor anti-fracking policymaking, 08-12 | -0.011 | -0.151 | -0.106 | -0.052 | -0.014 | 0.065 | 1.000 |
| (8) Neighbor pro-fracking policymaking, 08-12 | -0.053 | -0.083 | -0.097 | -0.096 | 0.035 | 0.049 | 0.546 | 1.000 |

| **Table A5. Matrix of tetrachoric correlations for binary variables** | | | | | | | | | |
| --- | --- | --- | --- | --- | --- | --- | --- | --- | --- |
|  | (1) | (2) | (3) | (4) | (5) | (6) | (7) | (8) | (9) |
| (1) Tourism policy, 03-07 | 1.000 |
| (2) Environmental policy, 03-07 | 1.000 | 1.000 |
| (3) Landowner coalition | -0.144 | 0.031 | 1.000 |
| (4) Anti-fracking PE, 08-12 | 0.205 | 0.048 | 0.384 | 1.000 |
| (5) Pro-fracking PE, 08-12 | -0.168 | 0.100 | 0.627 | 0.925 | 1.000 |
| (6) Own pro-fracking policy, 08-12 | -1.000 | -0.072 | 0.543 | 0.460 | 0.688 | 1.000 |
| (7) Own anti-fracking policy, 08-12 | 0.107 | 0.043 | 0.378 | 0.693 | 0.599 | 0.429 | 1.000 |
| (8) Shales | 0.142 | -0.156 | 0.553 | 0.664 | 0.599 | 0.248 | 0.598 | 1.000 |
| (9) City | 0.072 | -0.021 | -0.043 | 0.137 | -0.000 | -1.000 | 0.106 | 0.112 | 1.000 |

| **Table A6. Matrix of point-biserial correlations between binary and continuous variables** | | | | | | | | | |
| --- | --- | --- | --- | --- | --- | --- | --- | --- | --- |
|  | Tourism policy, 03-07 | Environ policy, 03-07 | Landowner coalition | Anti PE, 08-12 | Pro PE, 08-12 | Own pro policy, 08-12 | Own anti policy, 08-12 | Shales | City |
| Obama 2008 vote share | 0.159 | 0.278 | -0.087 | -0.026 | 0.001 | -0.080 | -0.012 | -0.300 | 0.145 |
| Population density (logged) | 0.038 | 0.139 | -0.121 | -0.166 | -0.155 | -0.089 | -0.202 | -0.108 | 0.198 |
| Average muni revenue, 08-12 (logged) | 0.061 | 0.131 | -0.069 | -0.118 | -0.104 | -0.132 | -0.143 | -0.328 | 0.197 |
| Socioeconomic status | 0.032 | 0.221 | -0.114 | -0.058 | -0.073 | -0.077 | -0.071 | -0.239 | -0.074 |
| Oily/gaseous spills | 0.136 | 0.261 | -0.104 | -0.009 | -0.011 | -0.016 | 0.002 | -0.082 | 0.187 |
| Oil/gas wells | -0.009 | -0.037 | 0.107 | 0.002 | 0.013 | 0.026 | 0.081 | 0.138 | -0.026 |
| Neighbor anti policymaking, 08-12 | 0.016 | 0.046 | 0.502 | 0.261 | 0.284 | 0.226 | 0.300 | 0.204 | -0.041 |
| Neighbor pro policymaking, 08-12 | -0.012 | 0.055 | 0.299 | 0.189 | 0.261 | 0.361 | 0.167 | 0.108 | -0.014 |

| **Table A7. Matrix of Spearman correlations between an ordinal variable and other variables** | | | | | | | | | | | | | |
| --- | --- | --- | --- | --- | --- | --- | --- | --- | --- | --- | --- | --- | --- |
|  | Obama 2008 | Population density | | | Average muni revenue, 08-12 | | SES | Oily/gas spills | | Oil/gas wells | Neighbor anti policy, 08-12 | Neighbor pro policy, 08-12 |  |
| Land use tools | 0.254 | 0.217 | | | 0.122 | | 0.299 | 0.395 | | -0.070 | -0.004 | -0.101 |  |
|  | Tourism policy, 03-07 | | Enviro policy, 03-07 | Landowner coalition | | Anti PE, 08-12 | | Pro PE, 08-12 | Own pro policy, 08-12 | | Own anti policy, 08-12 | Shales | City |
| Land use tools | 0.098 | | 0.300 | -0.099 | | 0.063 | | 0.009 | -0.025 | | 0.043 | 0.046 | 0.125 |

| **Table A8. Wald χ2 tests of equality of correlated policy loss variables in models of anti-fracking PE emergence** | | | | |
| --- | --- | --- | --- | --- |
|  | 2009 | 2010 | 2011 | 2012 |
| Landowner = pro PE (1) | 0.68 | 2.29 | 0.64 | 0.00 |
| Pro PE = pro policies (1) | 0.03 | 0.00 | 0.05 | 0.32 |
| Landowner = pro policies(1) | 0.768 | 1.44 | 0.23 | 0.48 |
| Landowner = pro PE = pro policies (2) | 1.00 | 2.95 | 0.83 | 0.48 |
| Anti PE = anti policies (1) | -- | 0.28 | 8.11** | 3.93* |
| *Notes:* *p*<0.05 * *p*<0.01 ** *p*<0.001 ***, two-tailed. | | | | |

**Figure A9. Models predicting emergence of anti-fracking policy entrepreneurs annually, 2009-2012, using a loss threat index**

2010

2010

2009

2009

2011

| Year | Wald χ2 | Pseudo R2 | |
| --- | --- | --- | --- |
| 2009 | (16) 27.92, *p* 0.032 | 0.08 | |
| 2010 | (16) 45.69, *p* 0.000 | 0.15 | |
| 2011 | (16) 46.03, *p* 0.000 | 0.14 | |
| 2012 | (16) 44.89, *p* 0.000 | 0.13 | |
| *Notes:* N=476. Constants and county omitted, 95% confidence intervals, two-tailed. Pseudo R2 is the square of the correlation between observed and predicted values. | | |

**Supplemental information references**

Blashfield, Roger. 1976. Mixture model tests of cluster analysis: Accuracy of four agglomerative hierarchical methods. *Psychological Bulletin* 83 (3): 377–88.

Murtagh, Fionn, and Petro Contreras. 2012. Algorithms for hierarchical clustering.

*WIREs January/February* 86–97.
